# Supplementary material for: Controllable Doping Characteristics for WSxSey Monolayers Based on the Tunable S/Se Ratio
Source: MDPI journal article supplement (doi:10.3390/nano13142107), 2023-07-19
Supplement: s1 [file s1]

# Controllable Doping Characteristics for $WS_xSe_y$ Monolayers Based on the Tunable S/Se Ratio

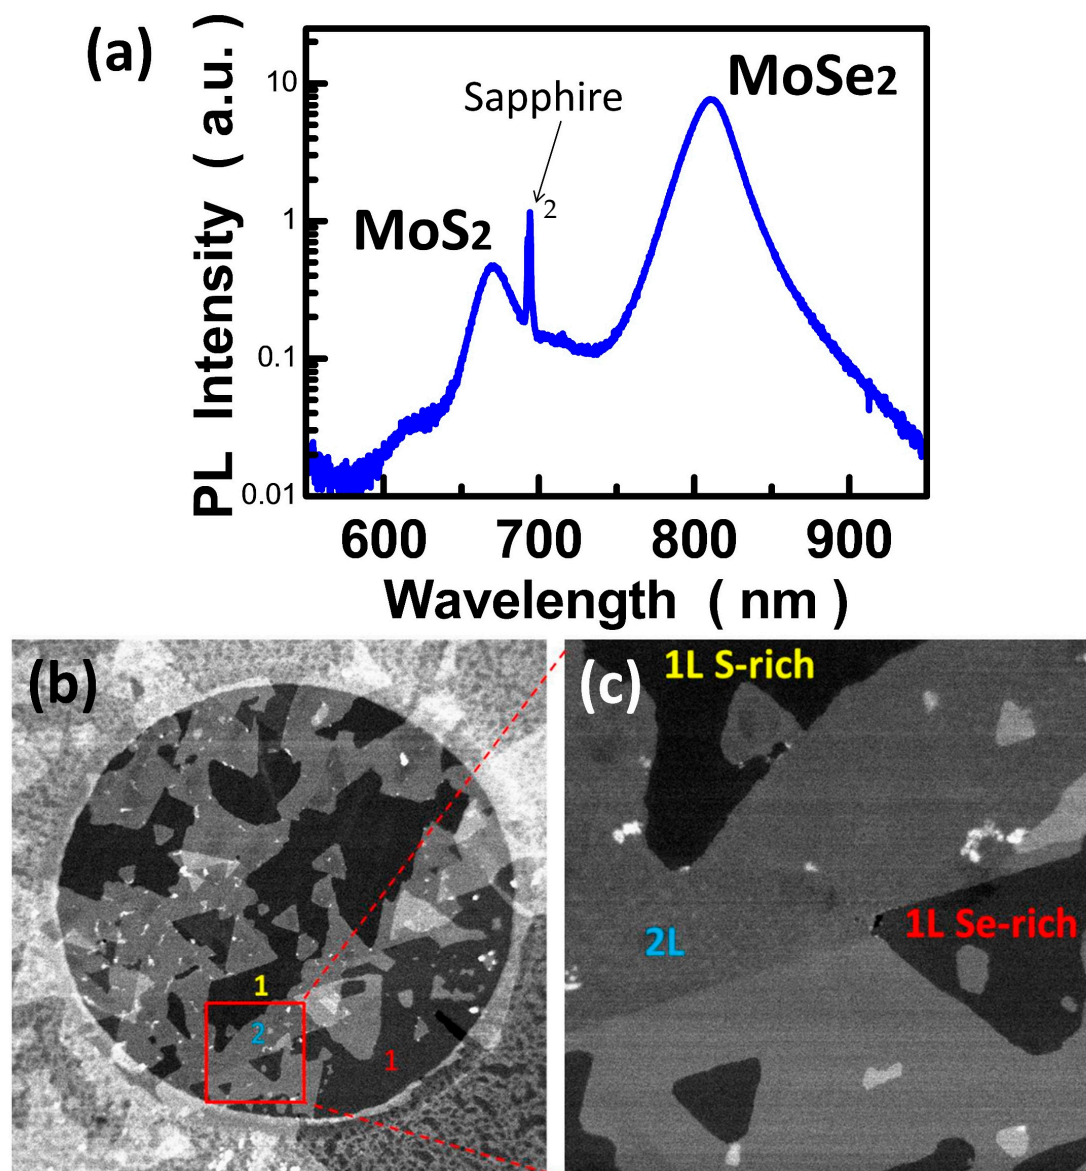

**Figure S1.** (a) PL spectrum showing the two characteristic peaks belonging to MoS<sub>2</sub> and MoSe<sub>2</sub> respectively. (b,c) The bright-field TEM images showing the distinguishable S- and Se-rich parts in the  $WS_xSe_y$ .

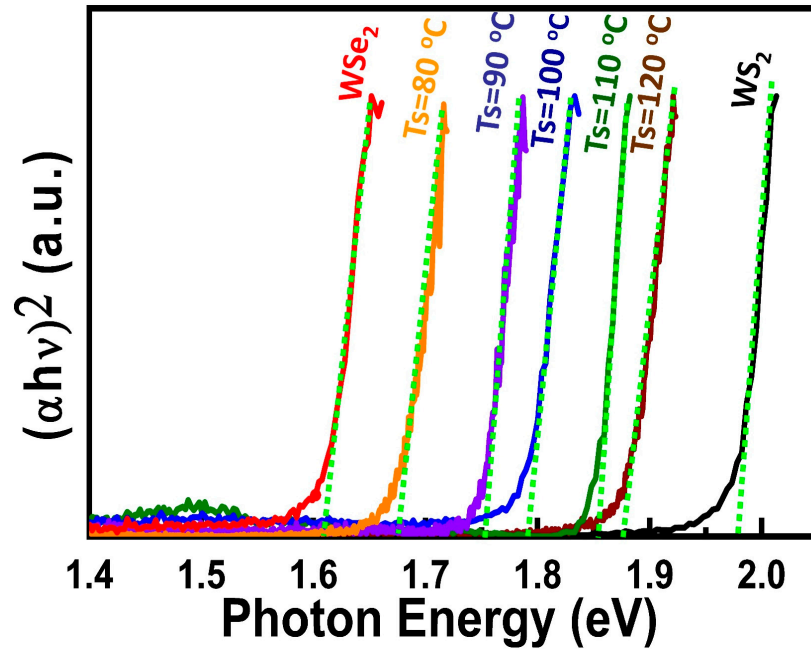

**Figure S2.** Plots of the  $(\alpha h\nu)^2$  versus photon energy ( $h\nu$ ) for direct inter-band transitions of  $WS_2$ ,  $WS_xSe_y$ , and  $WSe_2$  monolayers whose intercepts of tangents represent the band gap energy.

The optical  $E_g$  based on direct inter band transitions can be derived from the absorption coefficient equation as followed:  $\alpha = B_d(h\nu - E_g)^{1/2}/h\nu$ , where  $\alpha$  is the optical absorption coefficient,  $B_d$  is the absorption constant,  $h$  is the Planck constant and  $\nu$  is the frequency of the incident photon. Figures S2 show plots of  $(\alpha h\nu)^2$  versus the photon energy ( $h\nu$ ) for the  $WS_2$ ,  $WS_xSe_y$  at  $T_s=120, 110, 100, 90$  to  $80$  °C, and  $WSe_2$ , where the linear fit intercepts representing the optical  $E_g$  are 1.97, 1.88, 1.85, 1.79, 1.75, 1.67, and 1.61 eV, respectively.

**Table S1.** The chemical stoichiometries for the  $WS_2$ ,  $WS_xSe_y$  at  $T_s=120, 110, 100, 90$  to  $80$  °C, and  $WSe_2$  monolayers.

|       |    | $WS_2$ | $T_s=120^\circ C$ | $T_s=110^\circ C$ | $T_s=100^\circ C$ | $T_s=90^\circ C$ | $T_s=80^\circ C$ | $WSe_2$ |
|-------|----|--------|-------------------|-------------------|-------------------|------------------|------------------|---------|
| ratio | W  | 1      | 1                 | 1                 | 1                 | 1                | 1                | 1       |
|       | S  | 2.20   | 1.87              | 1.66              | 1.54              | 1.12             | 0.88             | 0       |
|       | Se | 0      | 0.31              | 0.40              | 0.48              | 1.00             | 1.39             | 1.77    |

**Table S2.** The band gap ( $E_g$ ), work function ( $\phi$ ), and  $E_F-E_v$  for the  $WS_2$ ,  $WS_xSe_y$  at  $T_s=120, 110, 100, 90$  to  $80$  °C, and  $WSe_2$  monolayers.

|                     |  | $WS_2$ | $T_s=120^\circ C$ | $T_s=110^\circ C$ | $T_s=100^\circ C$ | $T_s=90^\circ C$ | $T_s=80^\circ C$ | $WSe_2$ |
|---------------------|--|--------|-------------------|-------------------|-------------------|------------------|------------------|---------|
| Bandgap energy (eV) |  | 1.97   | 1.88              | 1.85              | 1.79              | 1.75             | 1.67             | 1.61    |
| Work function (eV)  |  | 4.31   | 4.17              | 4.06              | 4.03              | 4                | 3.96             | 3.95    |
| $E_F-E_v$ (eV)      |  | 0.735  | 0.835             | 0.885             | 0.90              | 0.91             | 0.91             | 0.96    |
